# Supplementary material for: IHF stabilizes pathogenicity island I of uropathogenic Escherichia coli strain 536 by attenuating integrase I promoter activity
Source: PubMed Central journal article supplement (PMC7286903; doi:10.1038/s41598-020-66215-2), 2020-06-10
Supplement: 41598_2020_66215_MOESM1_ESM.pdf [file 41598_2020_66215_MOESM1_ESM.pdf]

## Supplementary information

### **IHF stabilizes pathogenicity island I of uropathogenic *Escherichia coli* strain 536 by attenuating integrase I promoter activity**

Marco Chittò<sup>1,2</sup>, Michael Berger<sup>1</sup>, Petya Berger<sup>1</sup>, Luisa Klotz<sup>3</sup>, Peter Dröge<sup>4</sup>, Ulrich Dobrindt<sup>1,2</sup>

<sup>1</sup>Institute of Hygiene, University of Münster, Münster, Germany

<sup>2</sup>Interdisciplinary Center for Clinical Research, University of Münster, 48149 Münster, Germany

<sup>3</sup>Department of Neurology with Institute of Translational Neurology, University Hospital Münster, 48149 Münster, Germany

<sup>4</sup>School of Biological Sciences, Nanyang Technological University, 637551, Singapore

## **Supplementary material and methods**

### *General information*

All the primers used in this study were purchased from Sigma-Aldrich (Taufkirchen, Germany) and are listed in Table S1. All bacterial strains used in this study are listed in Table S2. All plasmids used this study are listed in Table S3. All the restriction enzymes and the T4 DNA ligase were purchased from New England Biolabs (Frankfurt, Germany). The relevant parts of all constructs were Sanger sequenced after analytical PCR for the chromosomal constructs and restriction digestion for the plasmid constructs.

**Supplementary Table S1.** Primers used in this study

| <b>Primer designation</b> | <b>Sequence (5'→3')</b>                                                |
|---------------------------|------------------------------------------------------------------------|
| MBP5                      | GGATGAATGGCAGAAATTCG                                                   |
| MBP206                    | GCTGAACTTGTGGCCGTTTA                                                   |
| MC11                      | TGATCTTCCGCCAACTAACC                                                   |
| MC14                      | GTACAACGTTATTCTCAATA                                                   |
| MC38                      | GGCATACTTCGAAAATTTTGCCTAACAGAAATAAAGAGCTGACAGAAGCTGTGTAGGCTGGAGCTGCTTC |
| MC39                      | CTTCCCCATGCCGAGTAGCGCCTTTTTAATCAAGCATTAGCTAACCTGAACATATGAATATCCTCCTTA  |
| MC46                      | TGTAGAGGCATTAAGAGCGATTCCAGGCATCATTGAGGGATTGAACCTGTGTAGGCTGGAGCTGCTTC   |
| MC47                      | CGACAGTGAAAAGAAAAAGGCCGAGAGCGCCTTTTTAGTTAGATCAGACATATGAATATCCTCCTTA    |
| MC48                      | AATGCAGCAACAGCAGCCGCTTAATTTGCCTTTAAGGAACCGGAGGAATCGTGTAGGCTGGAGCTGCTTC |
| MC49                      | GAAAAAGCACCCGACAGGTGCTTTTCTCGCGTTCAAGTTTGAGTAAAAACCATATGAATATCCTCCTTA  |
| MC60                      | ATCTGGACACTGGGGAGTTG                                                   |
| MC61                      | TTTCCAGGCTTCGATCAGAC                                                   |
| MC62                      | ATGAAAGGGAAGAGCCATGA                                                   |
| MC63                      | CGCGTCTTTTCTGGCTAATTT                                                  |
| MC68                      | ACCAGTCACCTGGCAAATC                                                    |
| MC69                      | TGGCGTAAATCAGGTAGTTGG                                                  |
| MC70                      | TGCAAACCTCTCCAACAACG                                                   |
| MC71                      | TTTGTGAACGTTGTCTGG                                                     |
| MC107                     | CGTGTATTAGGCGGAAAAAC                                                   |
| MC108                     | GTCCGGTGCAGATAAAATGC                                                   |
| MC111                     | CTCTTCGCTATTACGCCAGC                                                   |
| MC112                     | CATTAATTGCGTTGCGCTCACT                                                 |
| MC115                     | GTAACCATCCCTGCGAGAG                                                    |
| MC123                     | TAAAGGCGCAACCGTAGAAC                                                   |
| MC124                     | AGGGGTGTATTGGGGTATCA                                                   |
| MC125                     | TTTAACAACATCTTTGTTAT                                                   |
| MC138                     | CAATGGTACGCTGACTACATTGATTCACCTCGCTTCGAGACCTGAAACGAATGGTGTCTATCACTAAAGA |
| MC139                     | CCATCTGGCGTTGAGGCAGGGTGGTTATTCATTATTCAGTGTCACTGAATGATTTAATCTGTATCAGGC  |
| MC140                     | GGCACGGTTTCAGACACACT                                                   |
| 69_s                      | CATGCCATGGTGTCTATCACTAAAGATCAA                                         |
| 384                       | ACGACGTTGTAACGACGG                                                     |
| 385                       | AGGAAACAGCTATGACCATG                                                   |
| 733                       | ATCACGGCAGAAAAGTCCAC                                                   |
| 734                       | CTTCTCTCATCCGCCAAAAC                                                   |
| 1074                      | CATATGAATATCCTCCTTAGTTCC                                               |
| 1092                      | GTGTAGGCTGGAGCTGCTTC                                                   |
| 1720                      | GACTTCGTGGAGGACGACTT                                                   |

**Supplementary Table S2.** List of bacterial strains used in this study

| <i>E. coli</i> strains                                    | Description                                                                                                                               | Reference                   |
|-----------------------------------------------------------|-------------------------------------------------------------------------------------------------------------------------------------------|-----------------------------|
| 536                                                       | Uropathogenic wild type strain (O6:K15:H31)                                                                                               | Berger <i>et al.</i> , 1982 |
| 536 PAI I_P <i>dps-yfp-cat</i>                            | <i>Pdps-yfp-cat</i> inserted into PAI I <sub>536</sub>                                                                                    | Chittò <i>et al.</i> , 2019 |
| 536 PAI II_P <i>dps-yfp-cat</i>                           | <i>Pdps-yfp-cat</i> inserted into PAI II <sub>536</sub>                                                                                   | Chittò <i>et al.</i> , 2019 |
| 536 PAI III_P <i>dps-yfp-cat</i>                          | <i>Pdps-yfp-cat</i> inserted into PAI III <sub>536</sub>                                                                                  | Chittò <i>et al.</i> , 2019 |
| 536 PAI IV_P <i>dps-yfp-cat</i>                           | <i>Pdps-yfp-cat</i> inserted into PAI IV <sub>536</sub>                                                                                   | Chittò <i>et al.</i> , 2019 |
| 536 PAI V_P <i>dps-yfp-cat</i>                            | <i>Pdps-yfp-cat</i> inserted into PAI V <sub>536</sub>                                                                                    | Chittò <i>et al.</i> , 2019 |
| 536 PAI VI_P <i>dps-yfp-cat</i>                           | <i>Pdps-yfp-cat</i> inserted into PAI VI <sub>536</sub>                                                                                   | Chittò <i>et al.</i> , 2019 |
| 536 TR_P <i>dps-yfp-cat</i>                               | <i>Pdps-yfp-cat</i> inserted into TR                                                                                                      | Chittò <i>et al.</i> , 2019 |
| 536 PAI I_P <i>dps-yfp-cat fis::ble</i>                   | <i>Pdps-yfp-cat</i> inserted into PAI I <sub>536</sub> <i>fis</i> replaced with <i>ble</i>                                                | This study                  |
| 536 PAI II_P <i>dps-yfp-cat fis::ble</i>                  | <i>Pdps-yfp-cat</i> inserted into PAI II <sub>536</sub> <i>fis</i> replaced with <i>ble</i>                                               | This study                  |
| 536 PAI III_P <i>dps-yfp-cat fis::ble</i>                 | <i>Pdps-yfp-cat</i> inserted into PAI III <sub>536</sub> <i>fis</i> replaced with <i>ble</i>                                              | This study                  |
| 536 PAI IV_P <i>dps-yfp-cat fis::ble</i>                  | <i>Pdps-yfp-cat</i> inserted into PAI IV <sub>536</sub> <i>fis</i> replaced with <i>ble</i>                                               | This study                  |
| 536 PAI V_P <i>dps-yfp-cat fis::ble</i>                   | <i>Pdps-yfp-cat</i> inserted into PAI V <sub>536</sub> <i>fis</i> replaced with <i>ble</i>                                                | This study                  |
| 536 PAI VI_P <i>dps-yfp-cat fis::ble</i>                  | <i>Pdps-yfp-cat</i> inserted into PAI VI <sub>536</sub> <i>fis</i> replaced with <i>ble</i>                                               | This study                  |
| 536 TR_P <i>dps-yfp-cat fis::ble</i>                      | <i>Pdps-yfp-cat</i> inserted into TR <i>fis</i> replaced with <i>ble</i>                                                                  | This study                  |
| 536 PAI I_P <i>dps-yfp-cat ihfA::ble</i>                  | <i>Pdps-yfp-cat</i> inserted into PAI I <sub>536</sub> <i>ihfA</i> replaced with <i>ble</i>                                               | This study                  |
| 536 PAI II_P <i>dps-yfp-cat ihfA::ble</i>                 | <i>Pdps-yfp-cat</i> inserted into PAI II <sub>536</sub> <i>ihfA</i> replaced with <i>ble</i>                                              | This study                  |
| 536 PAI III_P <i>dps-yfp-cat ihfA::ble</i>                | <i>Pdps-yfp-cat</i> inserted into PAI III <sub>536</sub> <i>ihfA</i> replaced with <i>ble</i>                                             | This study                  |
| 536 PAI IV_P <i>dps-yfp-cat ihfA::ble</i>                 | <i>Pdps-yfp-cat</i> inserted into PAI IV <sub>536</sub> <i>ihfA</i> replaced with <i>ble</i>                                              | This study                  |
| 536 PAI V_P <i>dps-yfp-cat ihfA::ble</i>                  | <i>Pdps-yfp-cat</i> inserted into PAI V <sub>536</sub> <i>ihfA</i> replaced with <i>ble</i>                                               | This study                  |
| 536 PAI VI_P <i>dps-yfp-cat ihfA::ble</i>                 | <i>Pdps-yfp-cat</i> inserted into PAI VI <sub>536</sub> <i>ihfA</i> replaced with <i>ble</i>                                              | This study                  |
| 536 TR_P <i>dps-yfp-cat ihfA::ble</i>                     | <i>Pdps-yfp-cat</i> inserted into TR <i>ihfA</i> replaced with <i>ble</i>                                                                 | This study                  |
| 536 PAI I_P <i>dps-yfp-cat ihfB::aac(3)-I</i>             | <i>Pdps-yfp-cat</i> inserted into PAI I <sub>536</sub> <i>ihfB</i> replaced with <i>aac(3)-I</i>                                          | This study                  |
| 536 PAI II_P <i>dps-yfp-cat ihfB::aac(3)-I</i>            | <i>Pdps-yfp-cat</i> inserted into PAI II <sub>536</sub> <i>ihfB</i> replaced with <i>aac(3)-I</i>                                         | This study                  |
| 536 PAI III_P <i>dps-yfp-cat ihfB::aac(3)-I</i>           | <i>Pdps-yfp-cat</i> inserted into PAI III <sub>536</sub> <i>ihfB</i> replaced with <i>aac(3)-I</i>                                        | This study                  |
| 536 PAI IV_P <i>dps-yfp-cat ihfB::aac(3)-I</i>            | <i>Pdps-yfp-cat</i> inserted into PAI IV <sub>536</sub> <i>ihfB</i> replaced with <i>aac(3)-I</i>                                         | This study                  |
| 536 PAI V_P <i>dps-yfp-cat ihfB::aac(3)-I</i>             | <i>Pdps-yfp-cat</i> inserted into PAI V <sub>536</sub> <i>ihfB</i> replaced with <i>aac(3)-I</i>                                          | This study                  |
| 536 PAI VI_P <i>dps-yfp-cat ihfB::aac(3)-I</i>            | <i>Pdps-yfp-cat</i> inserted into PAI VI <sub>536</sub> <i>ihfB</i> replaced with <i>aac(3)-I</i>                                         | This study                  |
| 536 TR_P <i>dps-yfp-cat ihfB::aac(3)-I</i>                | <i>Pdps-yfp-cat</i> inserted into TR <i>ihfB</i> replaced with <i>aac(3)-I</i>                                                            | This study                  |
| 536 PAI I_P <i>dps-yfp-cat ihfA::ble ihfB::aac(3)-I</i>   | <i>Pdps-yfp-cat</i> inserted into PAI I <sub>536</sub> <i>ihfA</i> replaced with <i>ble</i> , <i>ihfB</i> replaced with <i>aac(3)-I</i>   | This study                  |
| 536 PAI II_P <i>dps-yfp-cat ihfA::ble ihfB::aac(3)-I</i>  | <i>Pdps-yfp-cat</i> inserted into PAI II <sub>536</sub> <i>ihfA</i> replaced with <i>ble</i> , <i>ihfB</i> replaced with <i>aac(3)-I</i>  | This study                  |
| 536 PAI III_P <i>dps-yfp-cat ihfA::ble ihfB::aac(3)-I</i> | <i>Pdps-yfp-cat</i> inserted into PAI III <sub>536</sub> <i>ihfA</i> replaced with <i>ble</i> , <i>ihfB</i> replaced with <i>aac(3)-I</i> | This study                  |

| <b><i>E. coli</i> strains</b>                            | <b>Description</b>                                                                                                                        | <b>Reference</b>              |
|----------------------------------------------------------|-------------------------------------------------------------------------------------------------------------------------------------------|-------------------------------|
| 536 PAI IV_P <i>dps-yfp-cat ihfA::ble ihfB::aac(3)-I</i> | P <i>dps-yfp-cat</i> inserted into PAI IV <sub>536</sub> <i>ihfA</i> replaced with <i>ble</i> , <i>ihfB</i> replaced with <i>aac(3)-I</i> | This study                    |
| 536 PAI V_P <i>dps-yfp-cat ihfA::ble ihfB::aac(3)-I</i>  | P <i>dps-yfp-cat</i> inserted into PAI V <sub>536</sub> <i>ihfA</i> replaced with <i>ble</i> , <i>ihfB</i> replaced with <i>aac(3)-I</i>  | This study                    |
| 536 PAI VI_P <i>dps-yfp-cat ihfA::ble ihfB::aac(3)-I</i> | P <i>dps-yfp-cat</i> inserted into PAI VI <sub>536</sub> <i>ihfA</i> replaced with <i>ble</i> , <i>ihfB</i> replaced with <i>aac(3)-I</i> | This study                    |
| 536 TR_P <i>dps-yfp-cat ihfA::ble ihfB::aac(3)-I</i>     | P <i>dps-yfp-cat</i> inserted into PAI I <sub>536</sub> <i>ihfA</i> replaced with <i>ble</i> , <i>ihfB</i> replaced with <i>aac(3)-I</i>  | This study                    |
| 536 PAI I_P <i>dps-yfp-cat intl::ble</i>                 | <i>intl</i> replaced with <i>ble</i>                                                                                                      | Chittò <i>et al.</i> , 2019   |
| 536 PAI I <i>intl::yfp-cat</i>                           | <i>intl</i> replaced with <i>yfp-cat</i>                                                                                                  | Chittò <i>et al.</i> , 2019   |
| 536 PAI I <i>intl::yfp-cat ihfB::ble</i>                 | <i>intl</i> replaced with <i>yfp-cat</i> , <i>ihfB</i> replaced with <i>ble</i>                                                           | This study                    |
| 536 <i>intl-yfp-ble(o)</i>                               | <i>yfp</i> transcriptionally fused downstream of the coding region of <i>intl</i>                                                         | This study                    |
| DH5α                                                     | F <sup>-</sup> Δ <i>lacU196</i> (Φ80 <i>lacZ</i> ΔM15) <i>recA1 hsdR17</i>                                                                | Taylor <i>et al.</i> , 1993   |
| MG1655                                                   | K-12 F <sup>-</sup> λ <sup>-</sup> <i>ilvG<sup>-</sup> rfb-50 rph-1</i>                                                                   | Blattner <i>et al.</i> , 1996 |
| BL21(DE3)                                                | F <sup>-</sup> <i>ompT gal dcm lon hsdS<sub>B</sub>(r<sub>B</sub><sup>-</sup>m<sub>B</sub><sup>-</sup>) [malB+]</i> K-12(λ <sup>S</sup> ) | Studier and Moffat, 1986      |
| SY327λ <i>pir</i>                                        | <i>thi-1 thr leu tonA lacY recA</i>                                                                                                       | Miller and Mekalanos, 1988    |

**Supplementary Table S3.** List of plasmids used in this study

| Plasmid                   | Description                                                                                                         | Reference                   |
|---------------------------|---------------------------------------------------------------------------------------------------------------------|-----------------------------|
| pKD46                     | <i>bla repA<sub>101</sub></i> (Ts) <i>araC araBp<sub>γβ</sub> exo</i>                                               | Datsenko and Wanner., 2000  |
| pBBR-1MCS-5               | <i>aac(3)-I</i> , template plasmid                                                                                  | Kovach <i>et al.</i> , 1995 |
| pEM7/Zeo                  | <i>bla, ble</i> , template plasmid                                                                                  | Invitrogen                  |
| pKD4                      | cloning vector                                                                                                      | Datsenko and Wanner., 2000  |
| pKD8                      | <i>ble</i> cassette cloned from pEM7/Zeo into pKD4 with the replacement of <i>aph</i> cassette                      | This study                  |
| pKD11                     | <i>aac(3)-I</i> cassette cloned from pBBR-1MCS-5 into pKD4 with the replacement of <i>aph</i> cassette              | This study                  |
| pBAD24                    | cloning vector                                                                                                      | Guzman <i>et al.</i> , 1995 |
| pBAD24yfp                 | <i>yfp</i> template plasmid                                                                                         | Berger <i>et al.</i> , 2016 |
| pBAD24yfp-ble             | <i>ble</i> cassette cloned from pKD8 into pBAD24yfp                                                                 | This study                  |
| pWKS30                    | expression vector                                                                                                   | Wang <i>et al.</i> , 1991   |
| pWKS30 <i>ihfB</i>        | <i>ihfB</i> cloned from <i>E. coli</i> strain 536 into pWKS30                                                       | This study                  |
| pMC1                      | <i>intI</i> cloned from <i>E. coli</i> strain 536 into pWKS30                                                       | This study                  |
| pMC2                      | <i>intI</i> cloned from <i>E. coli</i> strain 536 excluding the IHF binding site into pWKS30                        | This study                  |
| pMC3                      | <i>intI::yfp-cat</i> cloned from <i>E. coli</i> strain 536 PAI I <i>intI::yfp-cat</i> into pWKS30                   | This study                  |
| pMC5                      | <i>intI-yfp</i> cloned from <i>E. coli</i> strain 536 <i>intI-yfp</i> into pWKS30                                   | This study                  |
| pMC7                      | <i>intI-yfp</i> cloned from <i>E. coli</i> strain 536 <i>intI-yfp</i> excluding the IHF binding site into pWKS30    | This study                  |
| pETsclHF2                 | expression vector                                                                                                   | Bao <i>et al.</i> , 2004    |
| pUC19                     | <i>bla</i> , expression vector                                                                                      | New England BioLabs         |
| pUC19P <i>intI</i>        | P <i>intI</i> cloned from <i>E. coli</i> strain 536 PAI I <i>intI::yfp-cat</i> into pUC19                           | This study                  |
| pUC19P <i>intI</i> ΔIHFbs | P <i>intI</i> cloned from <i>E. coli</i> strain 536 PAI I <i>intI::yfp-cat</i> excluding the IHF binding into pUC19 | This study                  |

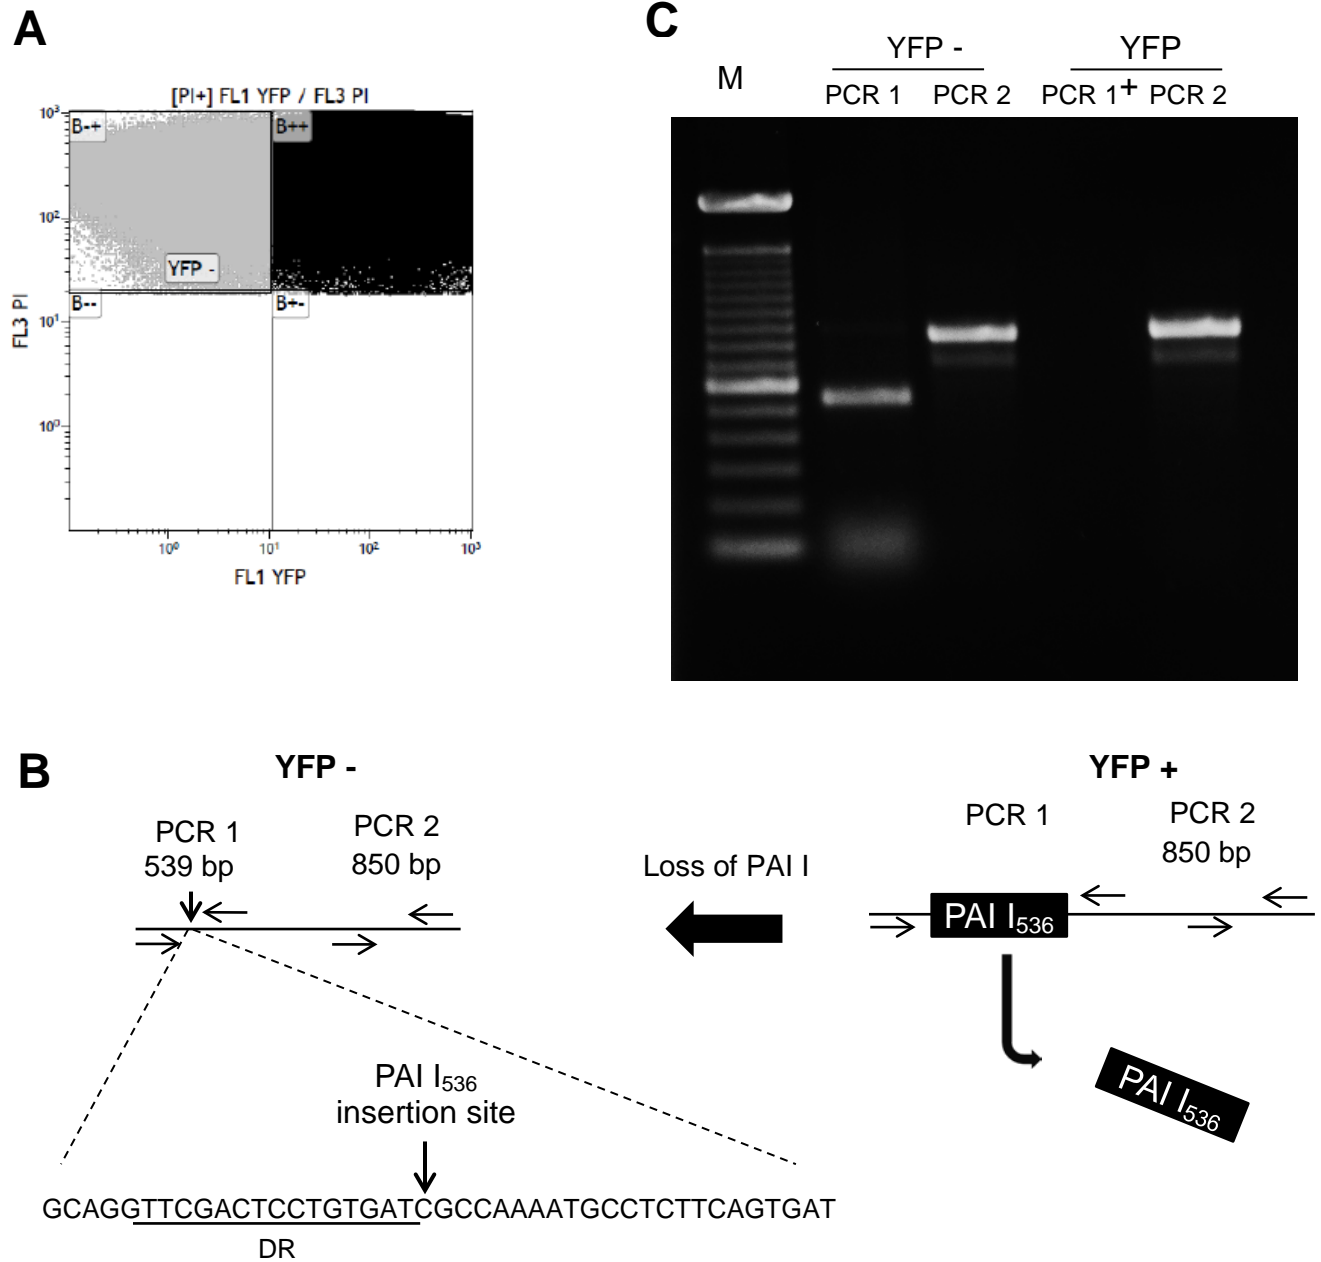

**Supplementary Figure S1. Confirmation of chromosomal deletion of PAI I<sub>536</sub> in YFP-negative cells.** Shown UPEC 536 PAI I<sub>Pdps-yfp-cat ihfA::ble ihfB::aac(3)-I</sub>. **A**) Flow cytometric representation of the sample when combining the FL1 / FL3 channels; **B**) 10<sup>5</sup> YFP-positive and 10<sup>5</sup> YFP-negative bacterial cells were sorted (BD FACS Aria III, Becton-Dickinson Biosciences, Heidelberg, Germany) and analyzed with PCR. In YFP-negative cells (grey) a specific 593-bp PCR product can only be amplified with the primer pair MC115/MC108 when PAI I<sub>536</sub> is deleted from the chromosome (PCR 1). This PCR product is absent in YFP-positive cells (black) where PAI I<sub>536</sub> is inserted into the chromosome. As control, primers MC62 and MC63 allow amplification of an 850-bp PCR product (PCR 2) were used. Shown is also the sequence of the scar region with the chromosomal PAI I<sub>536</sub> insertion site and the remaining repeat (DR). **C**) Detection of PCR products 1 and 2 in YFP-positive and -negative bacteria on a 1% agarose gel. Marker, 100-bp ladder.

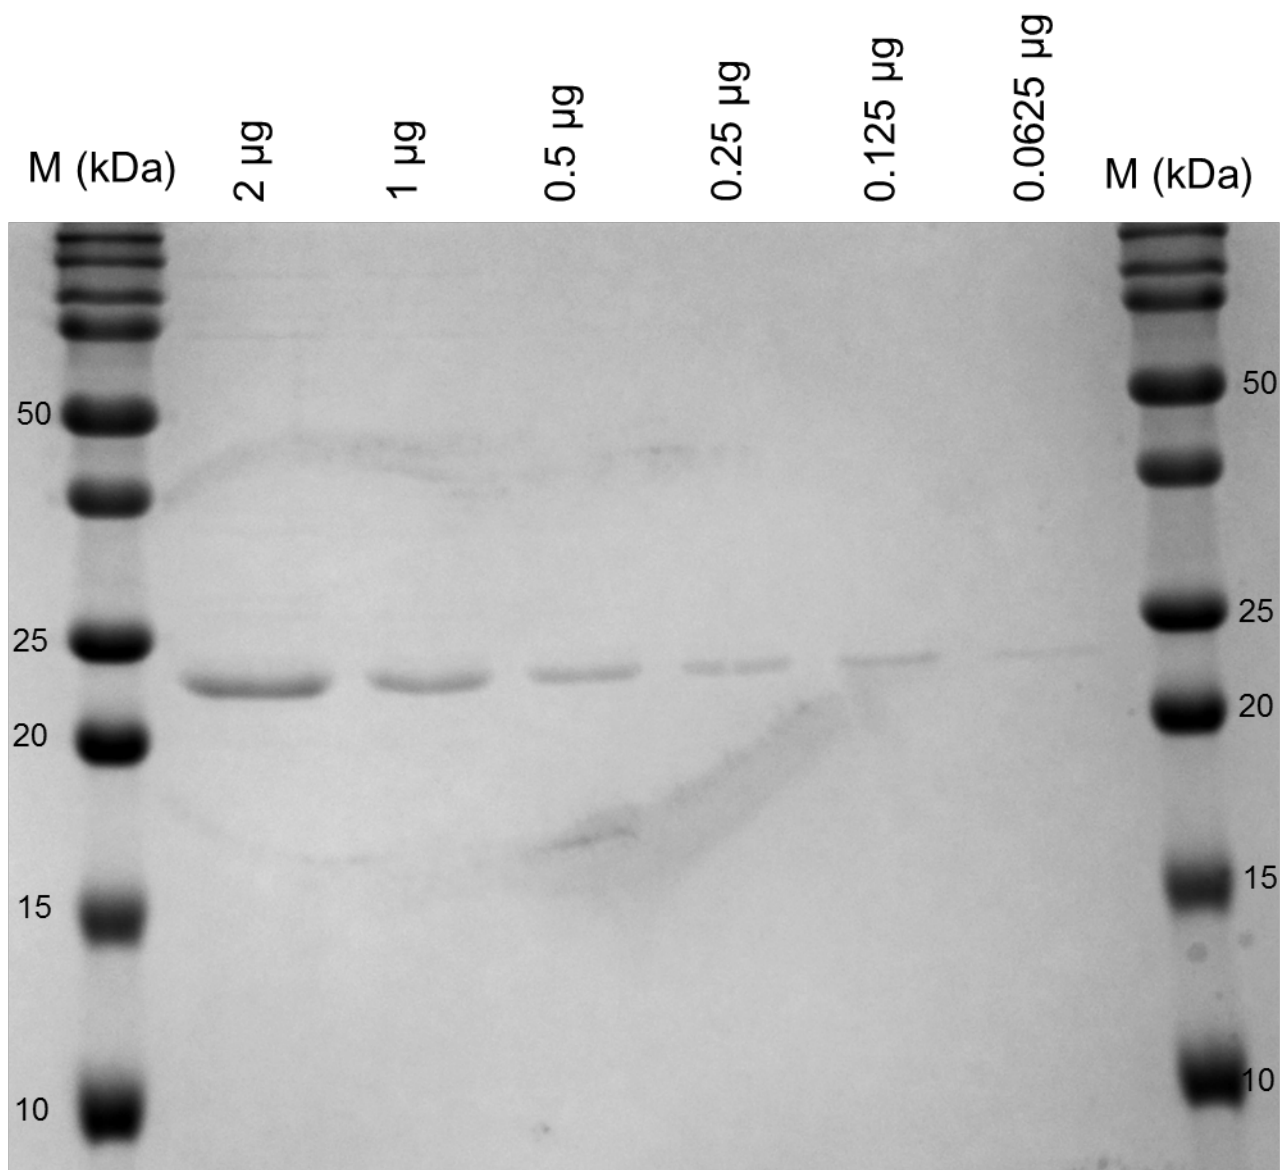

**Supplementary Figure S2. Control of purified sclHF2 by sodium dodecyl sulfate polyacrylamide gel electrophoresis (SDS PAGE).** sclHF2 was purified as described elsewhere. The protein concentration was determined using the BIO-RAD protein assay kit. Purified sclHF2 protein was analyzed in a 15% SDS-polyacrylamide gel together with molecular weight markers (Precision Plus Protein Dual Color Standards) (M) at the left and right side of the Coomassie-stained gel.



**A**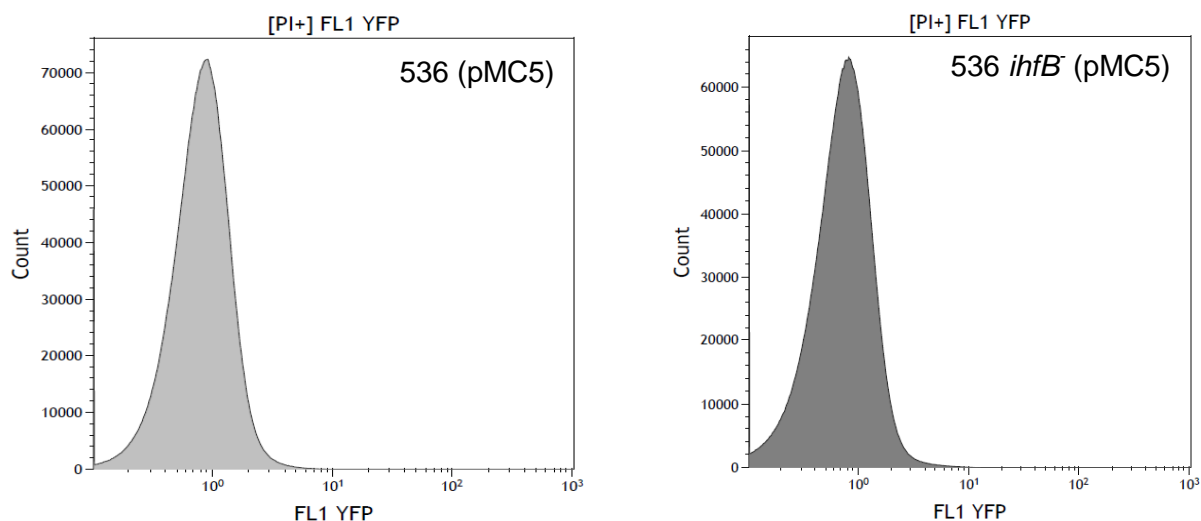**B**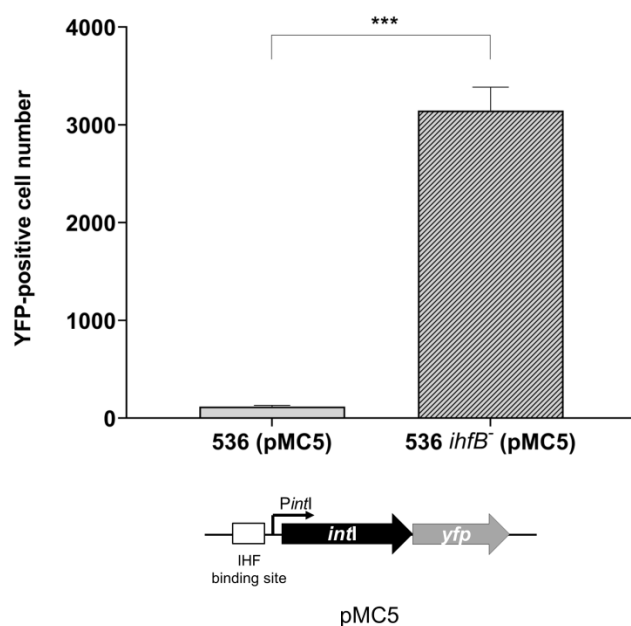

**Supplementary Figure S3. Features of the fluorescence signals of *E. coli* strains 536 (pMC5) and 536 *ihfB*<sup>-</sup> (pMC5).** **A)** Shown is the YFP fluorescence signal distribution within the bacterial populations of *E. coli* strains 536 (pMC5) (light grey) and 536 *ihfB*<sup>-</sup> (pMC5) (dark grey). 10<sup>7</sup> bacterial cells per sample were analyzed. **B)** Shown is the number of YFP-positive cells within the bacterial populations of strains 536 (pMC5) (light grey) and 536 *ihfB*<sup>-</sup> (pMC5) (dark grey). The *ihfB* mutant population contains a significantly higher number of cells with a strong fluorescence signal than the wild type population. The columns represent the average of three biological replicates, in which 10<sup>7</sup> cells per sample were analyzed (\* P<0.05; \*\* P<0.01; \*\*\* P<0.001).

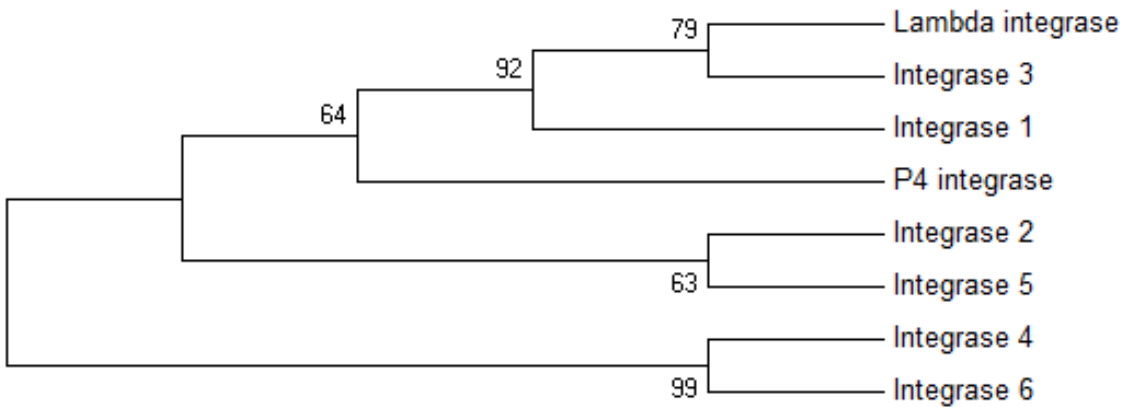

**Supplementary Figure S4. Relatedness of PAI-encoded integrases of *E. coli* strain 536.**

The relatedness of PAI I<sub>536</sub>-V<sub>I536</sub>-encoded integrases of *E. coli* strain 536 was calculated (Maximum Likelihood method based on the JTT matrix-based model<sup>1</sup> in MEGA7<sup>2</sup>. The integrases of bacteriophage  $\lambda$  (lambda) and P4 were included as references. The bootstrap consensus tree was inferred from 1000 replicates. Branches corresponding to partitions reproduced in less than 50% bootstrap replicates are collapsed. The percentage of replicate trees in which the associated integrases clustered together in the bootstrap test (1000 replicates) are shown next to the branches<sup>3</sup>. Initial tree(s) for the heuristic search were obtained automatically by applying Neighbor-Join and BioNJ algorithms to a matrix of pairwise distances estimated using a JTT model, and then selecting the topology with superior log likelihood value. The analysis involved eight amino acid sequences. All positions containing gaps and missing data were eliminated. There were a total of 351 positions in the final dataset.

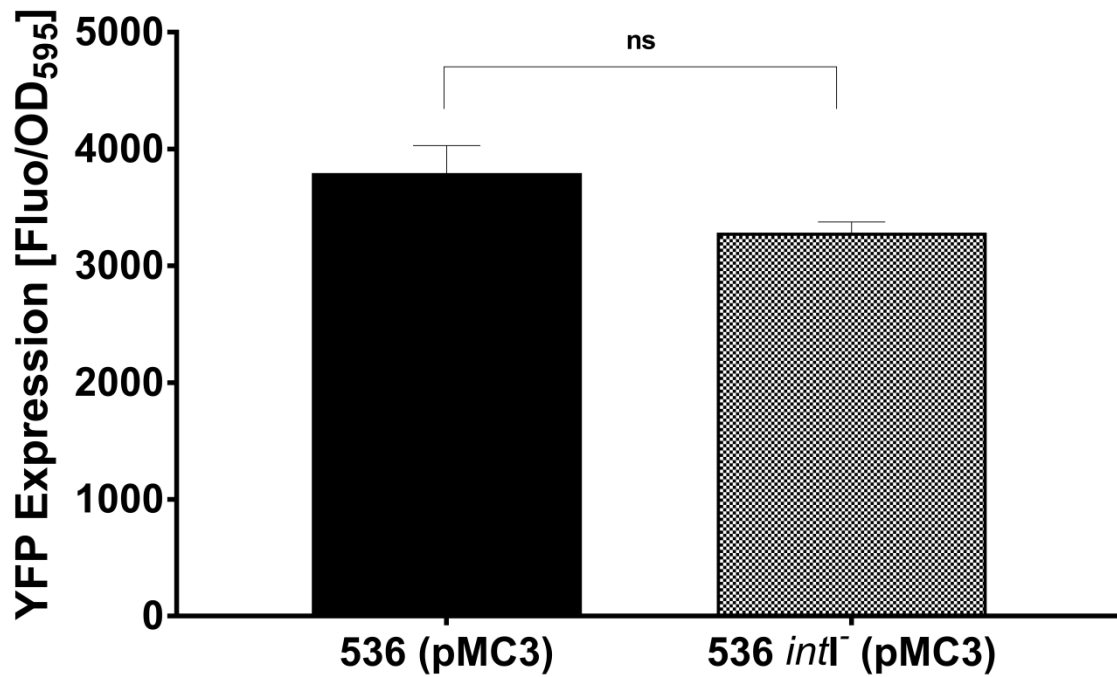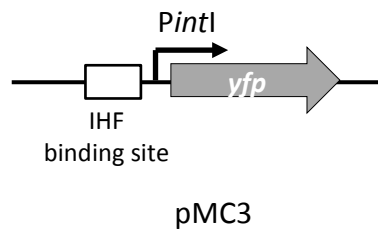

**Supplementary Figure S5. Comparison of the fluorescence signals of *E. coli* strain 536 (pMC3) and *E. coli* strain 536 *intI*<sup>-</sup> (pMC3)** Shown is the YFP fluorescence signal of *E. coli* strain 536 (pMC3) and *E. coli* strain 536 *intI*<sup>-</sup> (pMC3) normalized to the cell density (OD<sub>595</sub>). The overall fluorescence signal of *E. coli* strain 536 (pMC3) and *E. coli* strain 536 *intI*<sup>-</sup> (pMC3) is very strong and the measured values are comparable. The columns represent the average of three biological replicates (\* P<0.05;\*\* P<0.01;\*\*\* P<0.001).

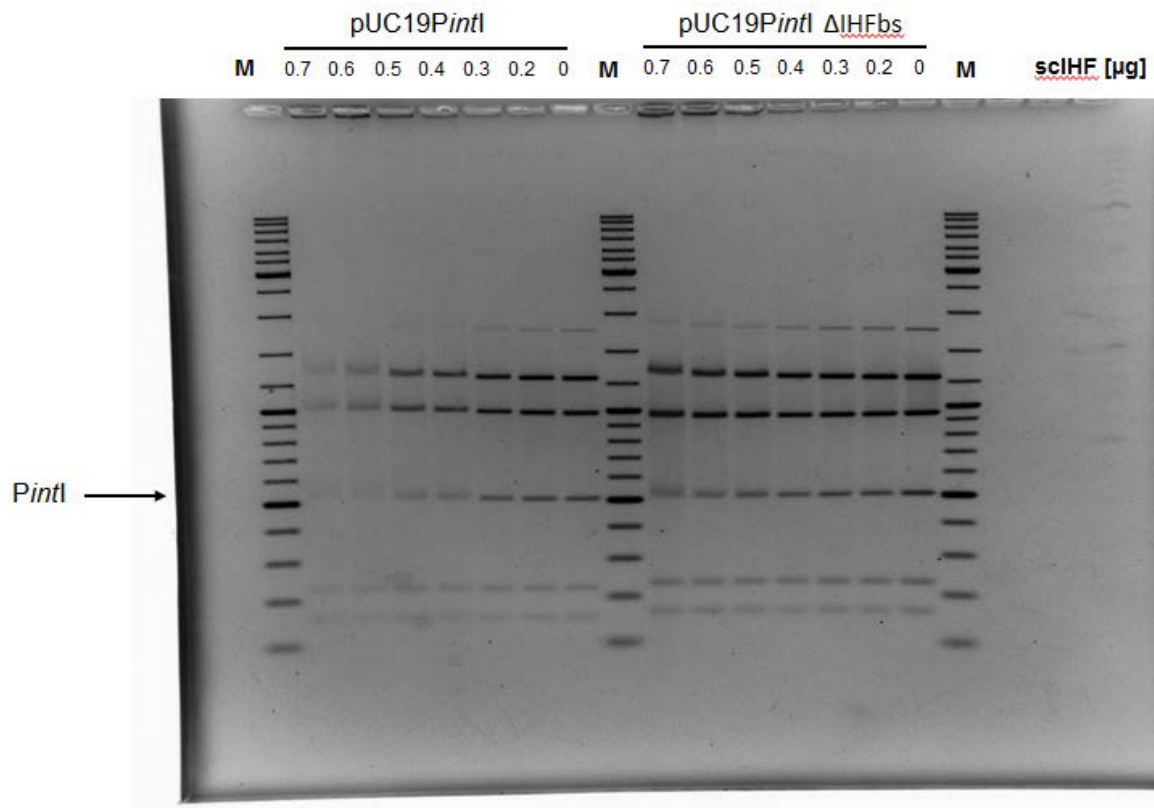

**Supplementary Figure S6. Analysis of sciHF binding to the *intI* upstream region by electrophoretic mobility shift assay (EMSA).** Single-chain IHF bound specifically to the promoter fragment (*Pintl*) of pUC19*Pintl* or pUC19*Pintl* $\Delta$ IHFbs only in the presence of the IHF binding site (left), but not when the binding site was absent (right). M, DNA size marker. The position of the *Pintl* containing DNA fragment is indicated.

## Supplementary literature

1. Jones, D. T., Taylor, W. R. & Thornton, J. M. The rapid generation of mutation data matrices. *Comput Appl Biosci.* **8**, 275–282 (1992).
2. Kumar, S., Stecher, G. & Tamura, K. MEGA7: Molecular Evolutionary Genetics Analysis Version 7.0 for Bigger Datasets. *Mol. Biol. Evol.* **33**, 1870–1874 (2016).
3. Felsenstein, J. Confidence Limits on Phylogenies: an Approach Using the Bootstrap. *Evolution (N. Y.)*. **39**, 783–791 (1985).
